# Supplementary material
Source: PubMed Central journal article supplement (PMC3249042)
Supplement: tjp0589-5677-SD1.pdf [file tjp0589-5677-SD1.pdf]

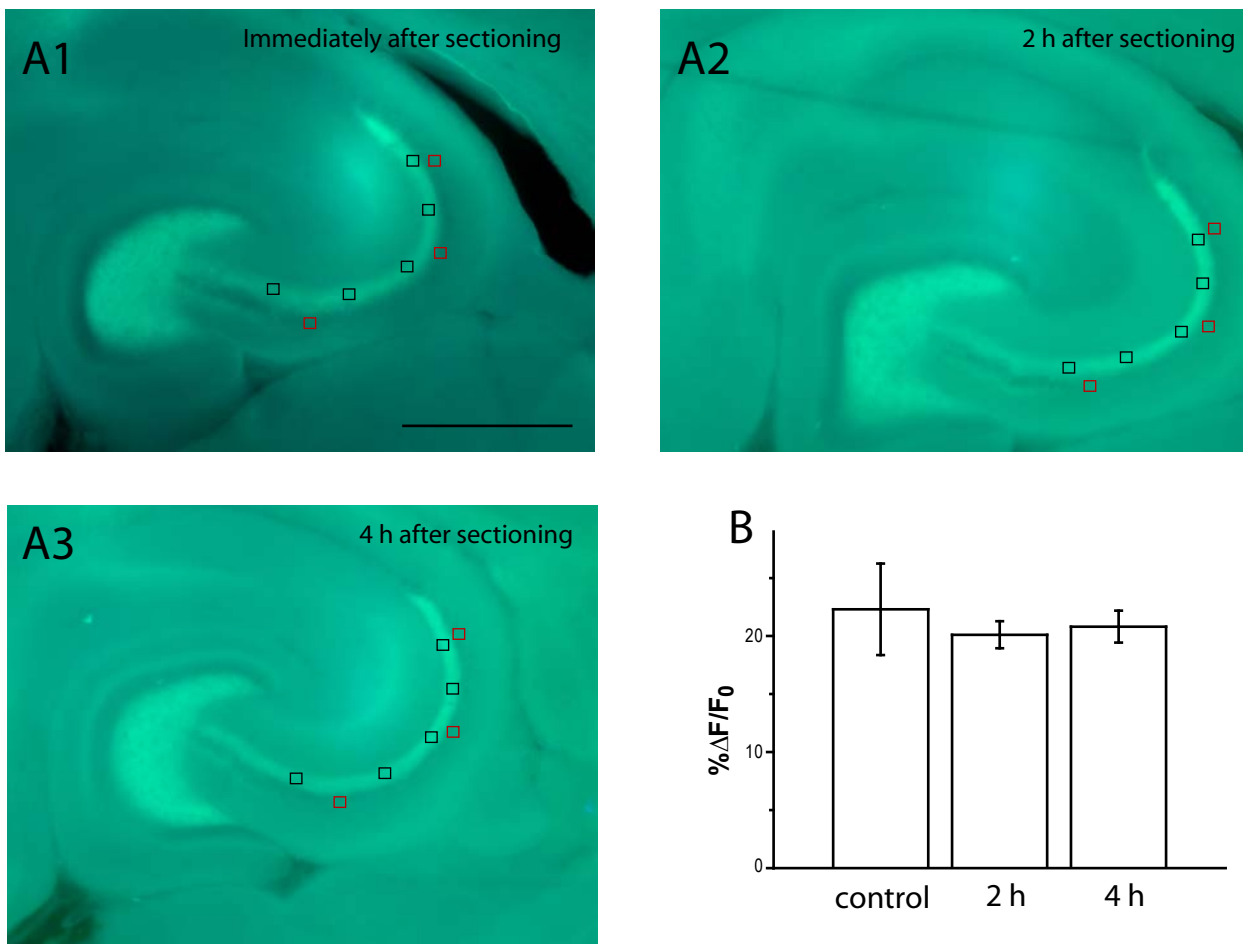

Supplementary Figure 1.

Vesicular zinc content is not altered during calcium imaging experiments.

**A1-A3:** Representative images of hippocampal slices stained with TSQ after sectioning (**A1**), and after  $Ca^{2+}$ -imaging experiments performed 2 (**A2**) and 4 (**A3**) hours later. Black squares indicate areas used to calculate average fluorescent intensity of zinc staining within st. lucidum and red squares correspond to the areas chosen to calculate background level of fluorescence. **B:** Bar graph showing that average level of fluorescence within st. lucidum did not significantly change within the time course of our experiments. Scale bar: 500  $\mu m$ .
